# Supplementary material
Source: MDPI journal article supplement (https://www.mdpi.com/1999-4907/13/11/1791)
Supplement: s1 [file s1]

## Supplementary material

### Field Trials to Assess Growth and Stomatal Densities of Five Mexican Pine Species and Their Hybrids, Under Common Plantation Conditions

Supplementary Table S1. Difference between basal diameters medians of *Pinus* species in millimeters and *p* values calculated in Kruskal-Wallis multiple testing (both trials);  $\alpha = 0.025$ .

| Species | PA-H      | PA-P       | PD-H               | PD-P       | PE-H                  | PE-P                  | PL-H      | PL-P      | PT-H      |
|---------|-----------|------------|--------------------|------------|-----------------------|-----------------------|-----------|-----------|-----------|
| PA-P    | 3.3 (1)   |            |                    |            |                       |                       |           |           |           |
| PD-H    | 0.4(0.81) | 2.9(0.8)   |                    |            |                       |                       |           |           |           |
| PD-P    | 1(0.83)   | 2.3(0.82)  | 0.65(1)            |            |                       |                       |           |           |           |
| PE-H    | 10(0.99)  | 13.3(0.99) | <b>10.4(0.001)</b> | 11.05(0.1) |                       |                       |           |           |           |
| PE-P    | 8.9(0.99) | 12.2(0.99) | <b>9.3(0.001)</b>  | 9.9(0.08)  | 1.1(1)                |                       |           |           |           |
| PL-H    | 6.4(0.58) | 9.7(0.61)  | 6.8(0.98)          | 7.4(0.99)  | <b>3.6(0.007)</b>     | <b>2.5(0.005)</b>     |           |           |           |
| PL-P    | 5.1(0.53) | 8.4(0.56)  | 5.5(0.97)          | 6.1(0.98)  | <b>4.9(0.02)</b>      | <b>3.8(0.018)</b>     | 1.3(1)    |           |           |
| PT-H    | 3.0(0.82) | 6.3(0.81)  | 3.4(1)             | 4.0(1)     | <b>7.0(&lt;0.001)</b> | <b>5.9(&lt;0.001)</b> | 3.4(0.96) | 2.1(0.94) |           |
| PT-P    | 1.7(0.69) | 5.0(0.7)   | 2.1(0.99)          | 2.7(0.99)  | <b>8.3(&lt;0.001)</b> | <b>7.2(&lt;0.001)</b> | 4.7(0.99) | 3.4(0.99) | 1.3(0.99) |

PD-P = *Pinus durangensis*, PE-P = *P. engelmannii* and PT-P = *P. teocote*. PA-H = *Pinus arizonica* x *P. durangensis* hybrids genetically more similar to *P. arizonica*; PD-H = *P. durangensis* x *P. arizonica* hybrids genetically more similar to *P. durangensis* & *P. durangensis* x *P. engelmannii* genetically more similar to *P. durangensis*; PE-H = *P. engelmannii* & *P. arizonica* hybrids genetically more similar to *P. engelmannii*; PL-H = *P. leiophylla* x *P. teocote* hybrids genetically more similar to *P. leiophylla*; PT-H = *P. leiophylla* x *P. teocote* hybrids genetically more similar to *P. teocote*.

Supplementary Table S2. Differences between the median height to the apical bud of *Pinus* species in cm, and the corresponding *p* values, calculated in Kruskal-Wallis multiple tests (overall for both trials);  $\alpha = 0.025$ .

|      | PA-H       | PA-P       | PD-H                   | PD-P                   | PE-H                   | PE-P                   | PL-H   | PL-P    | PT-H   |
|------|------------|------------|------------------------|------------------------|------------------------|------------------------|--------|---------|--------|
| PA-P | 6.1(1)     |            |                        |                        |                        |                        |        |         |        |
| PD-H | 13.4(0.91) | 7.3(1)     |                        |                        |                        |                        |        |         |        |
| PD-P | 14.8(0.87) | 8.6(1)     | 1.4(1)                 |                        |                        |                        |        |         |        |
| PE-H | 2.8(1)     | 8.9(0.96)  | <b>16.3(&lt;0.001)</b> | <b>17.7(&lt;0.001)</b> |                        |                        |        |         |        |
| PE-P | 2.7(1)     | 8.8(0.97)  | <b>16.2(&lt;0.001)</b> | <b>17.5(&lt;0.001)</b> | 0.1(1)                 |                        |        |         |        |
| PL-H | 13.2(0.87) | 7.0(1)     | 0.3(1)                 | 1.6(1)                 | <b>16(&lt;0.001)</b>   | <b>15.9(&lt;0.001)</b> |        |         |        |
| PL-P | 19(0.74)   | 12.8(0.99) | 5.6(0.99)              | 4.2(1)                 | <b>21.8(&lt;0.001)</b> | <b>21.7(&lt;0.001)</b> | 5.8(1) |         |        |
| PT-H | 14(0.91)   | 7.9(1)     | 0.6(1)                 | 0.8(1)                 | <b>16.8(&lt;0.001)</b> | <b>16.7(&lt;0.001)</b> | 0.8(1) | 5(0.99) |        |
| PT-P | 16.5(0.86) | 10.4(1)    | 3(1)                   | 1.7(1)                 | <b>19.3(&lt;0.001)</b> | <b>19.2(&lt;0.001)</b> | 3.3(1) | 2.5(1)  | 2.5(1) |

PD-P = *Pinus durangensis*, PE-P = *P. engelmannii* and PT-P = *Pinus teocote*. PA-H = *Pinus arizonica* x *P. durangensis* hybrids genetically more similar to *P. arizonica*; PD-H = *P. durangensis* x *P. arizonica* hybrids genetically more similar to *P. durangensis* (13 individuals) & *P. durangensis* x *P. engelmannii* genetically more similar to *P. durangensis* (63 individuals); PE-H = *P. engelmannii* & *P. arizonica* hybrids genetically more similar to *P. engelmannii*; PL-H = *P. leiophylla* x *P. teocote* hybrids genetically more similar to *P. leiophylla*; PT-H = *P. leiophylla* x *P. teocote* hybrids genetically more similar to *P. teocote*.

Supplementary Table S3. Difference between the medians of the maximum height to the top of the needles of *Pinus* species, in centimeters, and *p* values calculated in Kruskal-Wallis multiple tests (overall for both trials);  $\alpha = 0.025$ .

|      | PA-H       | PA-P       | PD-H                | PD-P                  | PE-H                  | PE-P                  | PL-H      | PL-P      | PT-H      |
|------|------------|------------|---------------------|-----------------------|-----------------------|-----------------------|-----------|-----------|-----------|
| PA-P | 2.5(1)     |            |                     |                       |                       |                       |           |           |           |
| PD-H | 14.8(0.24) | 12.4(0.59) |                     |                       |                       |                       |           |           |           |
| PD-P | 15.7(0.19) | 13.2(0.52) | 0.9(0.99)           |                       |                       |                       |           |           |           |
| PE-H | 5.8(0.98)  | 3.4(0.99)  | <b>9(&lt;0.001)</b> | <b>9.9(&lt;0.001)</b> |                       |                       |           |           |           |
| PE-P | 5.8(0.98)  | 3.4(0.99)  | <b>9(&lt;0.001)</b> | <b>9.9(&lt;0.001)</b> | 0(1)                  |                       |           |           |           |
| PL-H | 11.2(0.7)  | 8.8(0.91)  | 3.6(0.84)           | 4.5(0.74)             | 5.4(0.34)             | 5.4(0.41)             |           |           |           |
| PL-P | 15.8(0.48) | 13.4(0.78) | 1(0.99)             | 0.1(0.99)             | 10(0.11)              | 10(0.13)              | 4.6(0.99) |           |           |
| PT-H | 10.6(0.72) | 8.1(0.92)  | 4.2(0.04)           | 5(0.11)               | <b>4.8(&lt;0.001)</b> | <b>4.8(0.001)</b>     | 1.2(1)    | 5.3(0.97) |           |
| PT-P | 12.4(0.51) | 9.9(0.82)  | 2.4(0.81)           | 3.2(0.74)             | <b>6.6(&lt;0.001)</b> | <b>6.6(&lt;0.001)</b> | 1.2(0.99) | 3.4(0.99) | 1.8(0.89) |

PD-P = *Pinus durangensis*, PE-P = *P. engelmannii* and PT-P = *P. teocote*; PA-H = *P. arizonica* x *P. durangensis* hybrid genetically more similar to *P. arizonica*; PD-H = *P. durangensis* x *P. arizonica* hybrids genetically more similar to *P. durangensis* (13 individuals) and *P. durangensis* x *P. engelmannii* genetically more similar to *P. durangensis* (63 individuals); PE-H = *P. engelmannii* x *P. arizonica* hybrids genetically more similar to *P. engelmannii*; PL-H = *P. leiophylla* x *P. teocote* hybrids genetically more similar to *P. leiophylla*; PT-H = *P. leiophylla* x *P. teocote* hybrids genetically more similar to *P. teocote*.

Supplementary Table S4. Delta index ( $\delta$ ) and corresponding *p* values in delta tests for the survival of *Pinus* species (both trials combined),  $\alpha = 0.025$ .

|      | PA-H               | PA-P                   | PD-H              | PD-P                   | PE-H               | PE-P       | PL-H       | PL-P       | PT-H       |
|------|--------------------|------------------------|-------------------|------------------------|--------------------|------------|------------|------------|------------|
| PA-P | <b>0.33(0.002)</b> |                        |                   |                        |                    |            |            |            |            |
| PD-H | 0.05(0.81)         | <b>0.28(&lt;0.001)</b> |                   |                        |                    |            |            |            |            |
| PD-P | 0.18(0.07)         | <b>0.14(0.03)</b>      | <b>0.14(0.01)</b> |                        |                    |            |            |            |            |
| PE-H | 0.0003(1)          | <b>0.33(&lt;0.001)</b> | 0.05(0.23)        | <b>0.18(&lt;0.001)</b> |                    |            |            |            |            |
| PE-P | 0.04(0.84)         | <b>0.29(&lt;0.001)</b> | 0.01(0.87)        | <b>0.15(0.002)</b>     | 0.25(0.99)         |            |            |            |            |
| PL-H | 0.09(0.46)         | <b>0.24(0.003)</b>     | 0.04(0.56)        | 0.09(0.19)             | 0.09(0.15)         | 0.05(0.45) |            |            |            |
| PL-P | 0.14(0.29)         | <b>0.18(0.02)</b>      | 0.09(0.20)        | 0.04(0.60)             | 0.14(0.05)         | 0.10(0.15) | 0.05(0.57) |            |            |
| PT-H | 0.07(0.52)         | <b>0.25(&lt;0.001)</b> | 0.02(0.58)        | <b>0.11(0.02)</b>      | 0.06(0.99)         | 0.15(0.99) | 0.01(0.89) | 0.06(0.38) |            |
| PT-P | 0.11(0.37)         | <b>0.21(0.001)</b>     | 0.06(0.14)        | 0.06(0.17)             | <b>0.12(0.001)</b> | 0.06(0.64) | 0.02(0.77) | 0.02(0.75) | 0.04(0.27) |

PD-P = *Pinus durangensis*, PE-P = *P. engelmannii* and PT = *P. teocote*; PA-H = *P. arizonica* x *P. durangensis* hybrids genetically more similar to *P. arizonica*; PD-H = *P. durangensis* x *P. arizonica* hybrids genetically more similar to *P. durangensis* (13 individuals) and *P. durangensis* x *P. engelmannii* genetically more similar to *P. durangensis* (63 individuals); PE-H = *P. engelmannii* & *P. arizonica* hybrids genetically more similar to *P. engelmannii*; PL-H = *P. leiophylla* x *P. teocote* hybrids genetically more similar to *P. leiophylla*; PT-H = *P. leiophylla* x *P. teocote* hybrids genetically more similar to *P. teocote*.
